# Supplementary material
Source: Springer Nature journal article supplement (https://www.springermedizin.de/resource/supplementary/12916_2012_662_MOESM10_ESM.pdf/9597936)

## DNA Methylation

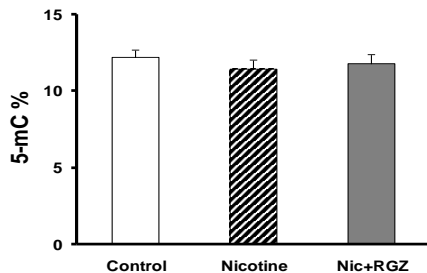

## H3 Acetylation

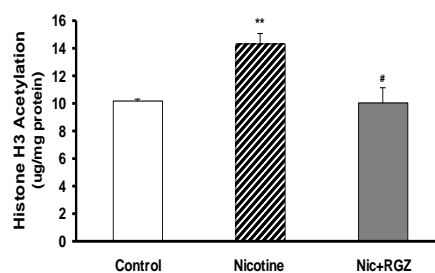

## H4 Acetylation

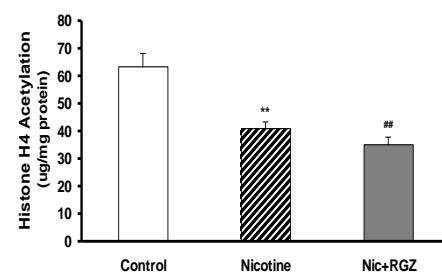

Lung

Testis

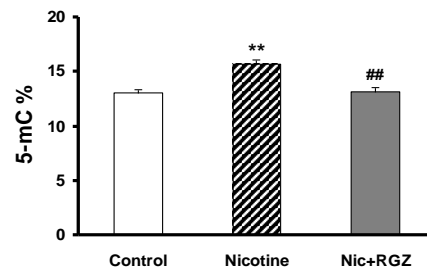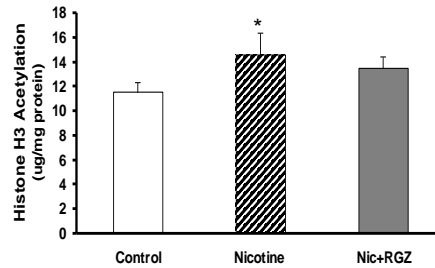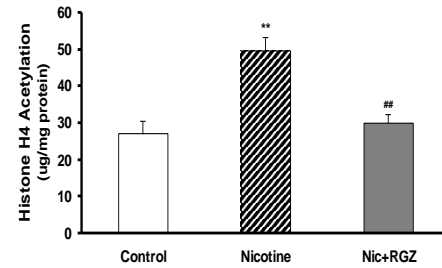

Ovary

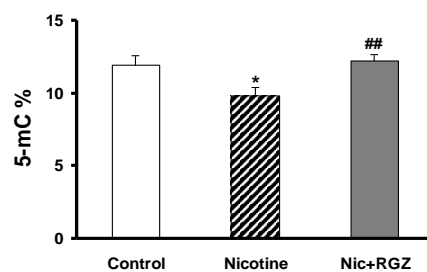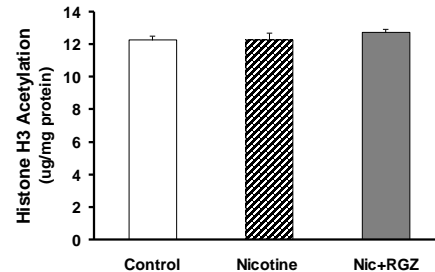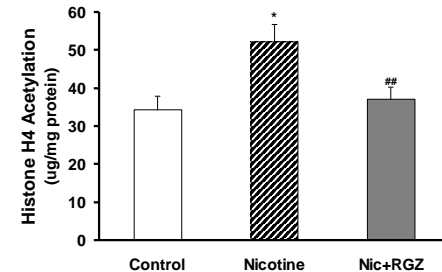

Supplement: MOESM10 [file 9597936]
